# Supplementary material for: Deactivation of Pd/SSZ-13 by Potassium and Water for Passive NOx Adsorption
Source: MDPI journal article supplement (doi:10.3390/pr10020222), 2022-01-25
Supplement: s1 [file s1]

## Article

# Deactivation of Pd/SSZ-13 by Potassium and Water for Passive NO<sub>x</sub> Adsorption

Chi Fan <sup>1,†</sup>, Jinxing Mi <sup>2,†</sup>, Qin Wu <sup>3</sup>, Jianjun Chen <sup>1,\*</sup> and Junhua Li <sup>1</sup>

<sup>1</sup> State Key Joint Laboratory of Environment Simulation and Pollution Control, National Engineering Laboratory for Multi Flue Gas Pollution Control Technology and Equipment, School of Environment, Tsinghua University, Beijing 100084, China; fanchi@mail.tsinghua.edu.cn (C.F.); lijunhua@tsinghua.edu.cn (J.L.)

<sup>2</sup> State Key Laboratory of Catalysis, Dalian Institute of Chemical Physics, Chinese Academy of Sciences, Dalian 116023, China; mijinxing@dicp.ac.cn

<sup>3</sup> Key Laboratory of Material Chemistry for Energy Conversion and Storage, Ministry of Education, School of Chemistry and Chemical Engineering, Huazhong University of Science and Technology, Wuhan 430074, China; wuqinlx@163.com

\* Correspondence: chenjianjun@tsinghua.edu.cn

† These authors contributed equally to this work.

**Citation:** Fan, C.; Mi, J.; Wu, Q.; Chen, J.; Li, J. Deactivation of Pd/SSZ-13 by Potassium and Water for Passive NO<sub>x</sub> Adsorption. *Processes* **2022**, *10*, 222. <https://doi.org/10.3390/pr10020222>

Academic Editors: Chi He and Zhiming Liu

Received: 27 December 2021

Accepted: 20 January 2022

Published: 25 January 2022

**Publisher's Note:** MDPI stays neutral with regard to jurisdictional claims in published maps and institutional affiliations.

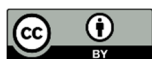

**Copyright:** © 2022 by the authors. Licensee MDPI, Basel, Switzerland. This article is an open access article distributed under the terms and conditions of the Creative Commons Attribution (CC BY) license (<https://creativecommons.org/licenses/by/4.0/>).

**Table S1.** The surface area and pore volume of the samples.

| Sample         | $S_{\text{BET}}$<br>$\text{m}^2/\text{g}$ | $S_{\text{micro}}$<br>$\text{m}^2/\text{g}$ | $V_{\text{total}}$<br>$\text{cm}^3/\text{g}$ | $V_{\text{micro}}$<br>$\text{cm}^3/\text{g}$ |
|----------------|-------------------------------------------|---------------------------------------------|----------------------------------------------|----------------------------------------------|
| Pd/SSZ-13      | 392                                       | 347                                         | 0.23                                         | 0.18                                         |
| 0.5K-Pd/SSZ-13 | 348                                       | 301                                         | 0.21                                         | 0.16                                         |
| 1.0K-Pd/SSZ-13 | 318                                       | 274                                         | 0.19                                         | 0.14                                         |
| 1.5K-Pd/SSZ-13 | 262                                       | 229                                         | 0.15                                         | 0.12                                         |

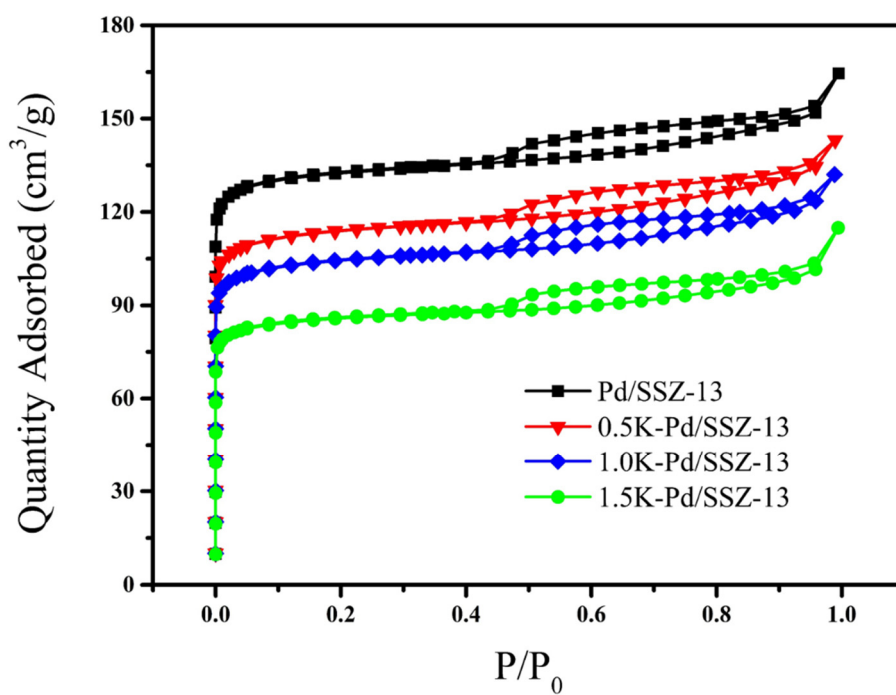**Figure S1.**  $\text{N}_2$  physisorption isotherms of Pd/SSZ-13 and K deactivated samples.

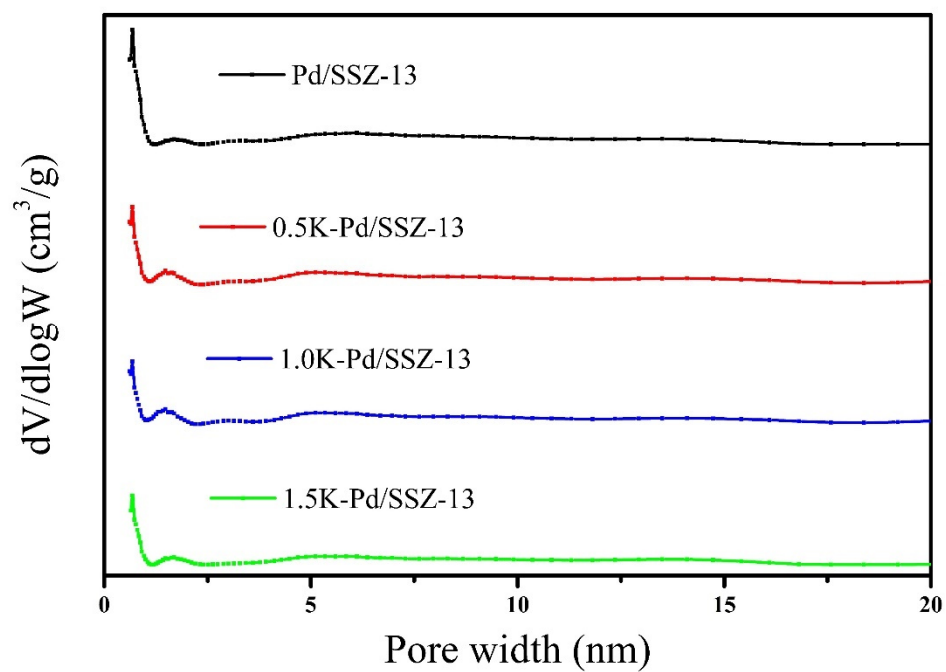

Figure S2. Pore distributions of Pd/SSZ-13 and K deactivated samples.

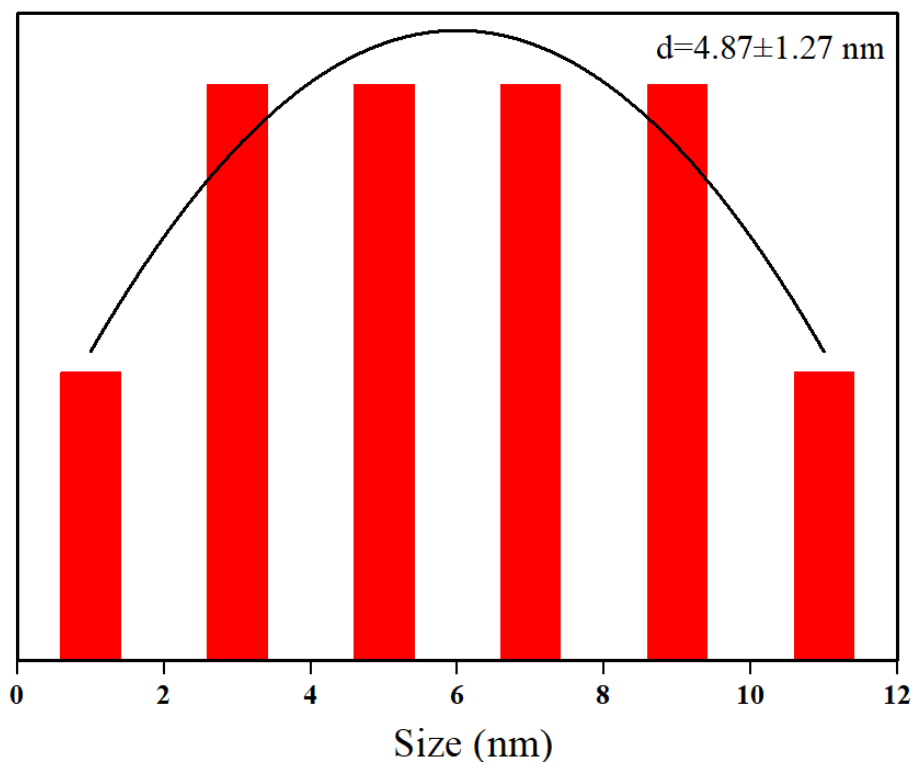

Figure S3. Standard deviation values of 0.5K-Pd/SSZ-13.

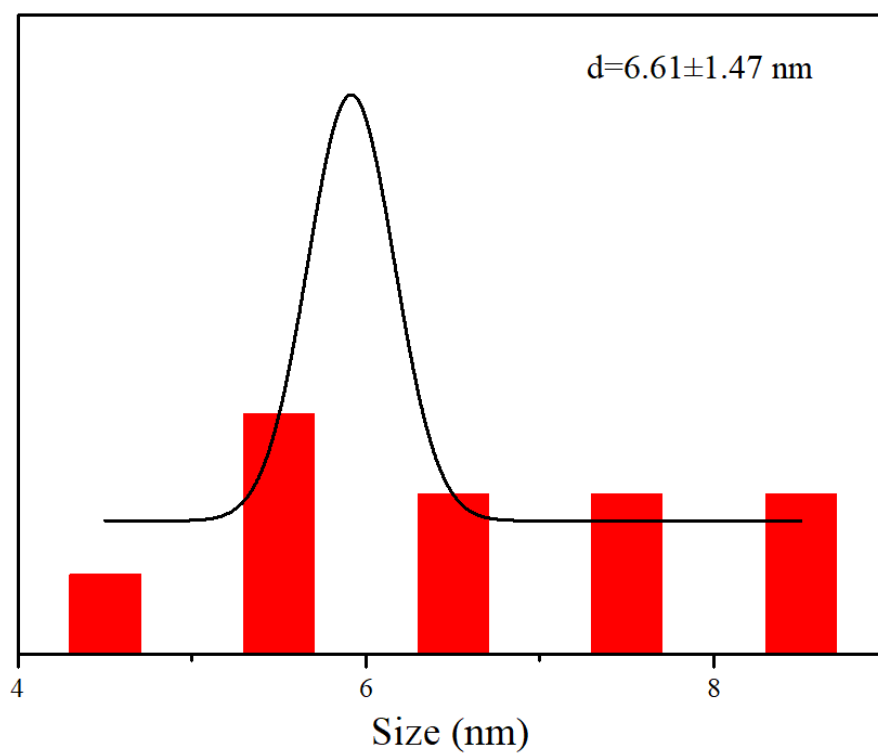

Figure S4. Standard deviation values of 1.0K-Pd/SSZ-13.

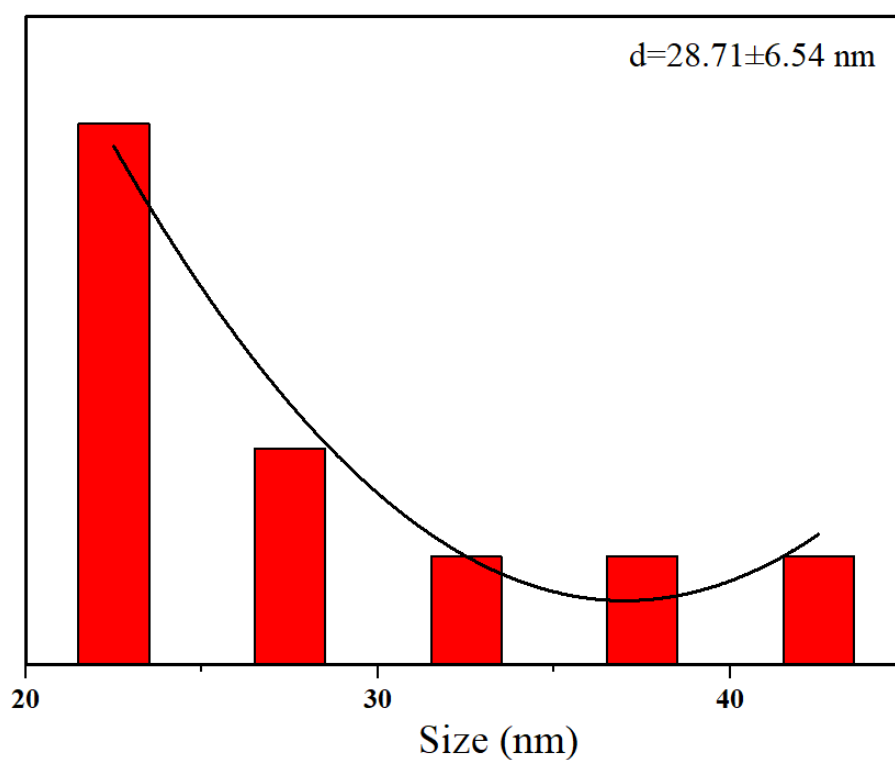

Figure S5. Standard deviation values of 1.5K-Pd/SSZ-13.

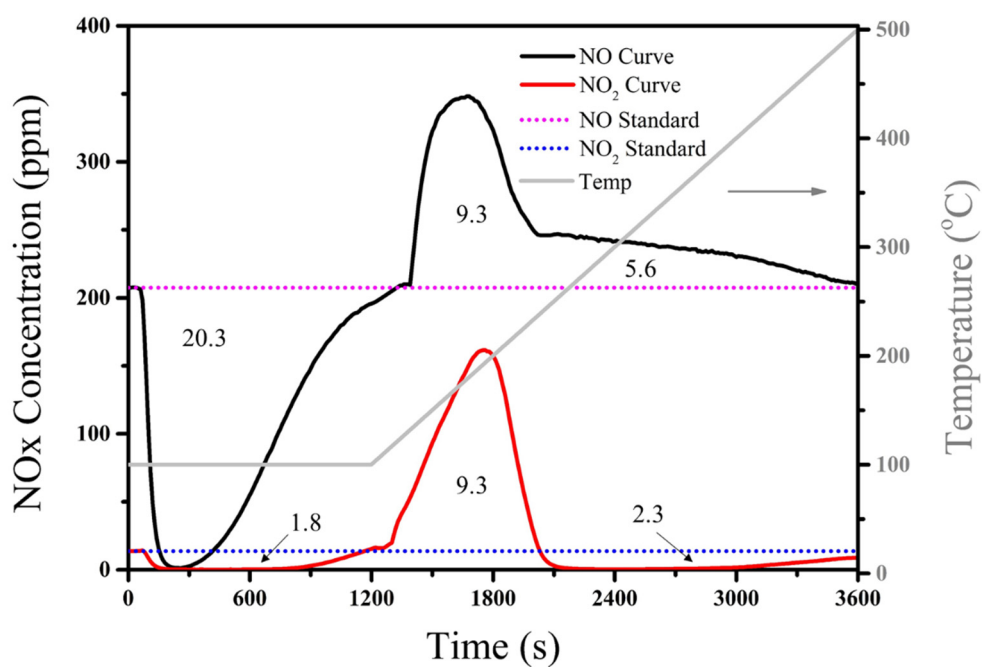

**Figure S6.** Transient NO<sub>x</sub> adsorption at 100°C and temperature programmed desorption of Pd/SSZ-13 without O<sub>2</sub> in the heating up period.

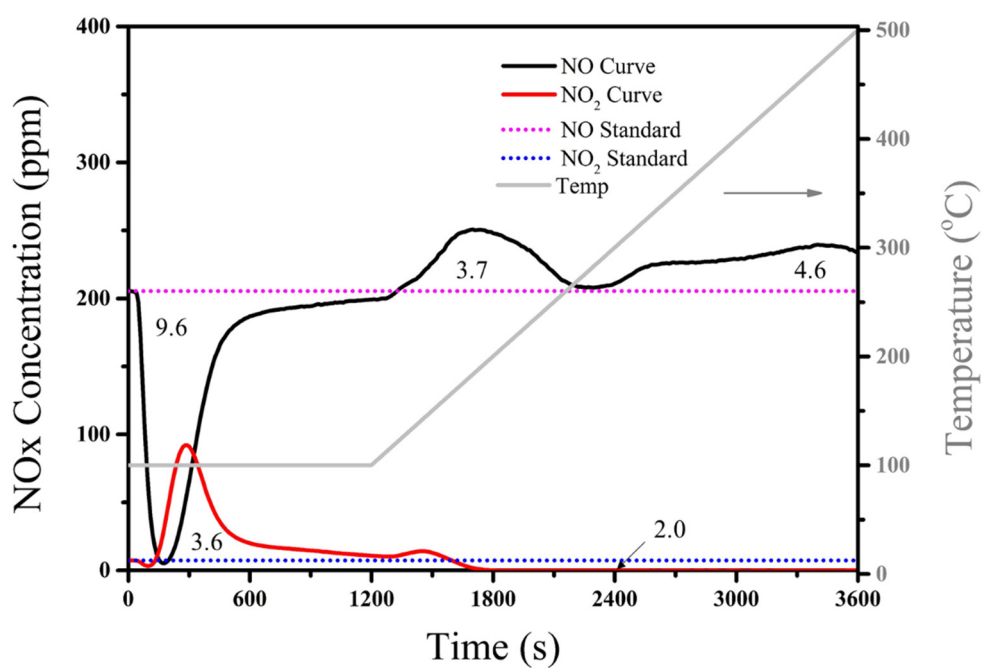

**Figure S7.** Transient NO<sub>x</sub> adsorption at 100°C and temperature programmed desorption of Pd/SSZ-13 without O<sub>2</sub> in the whole test.

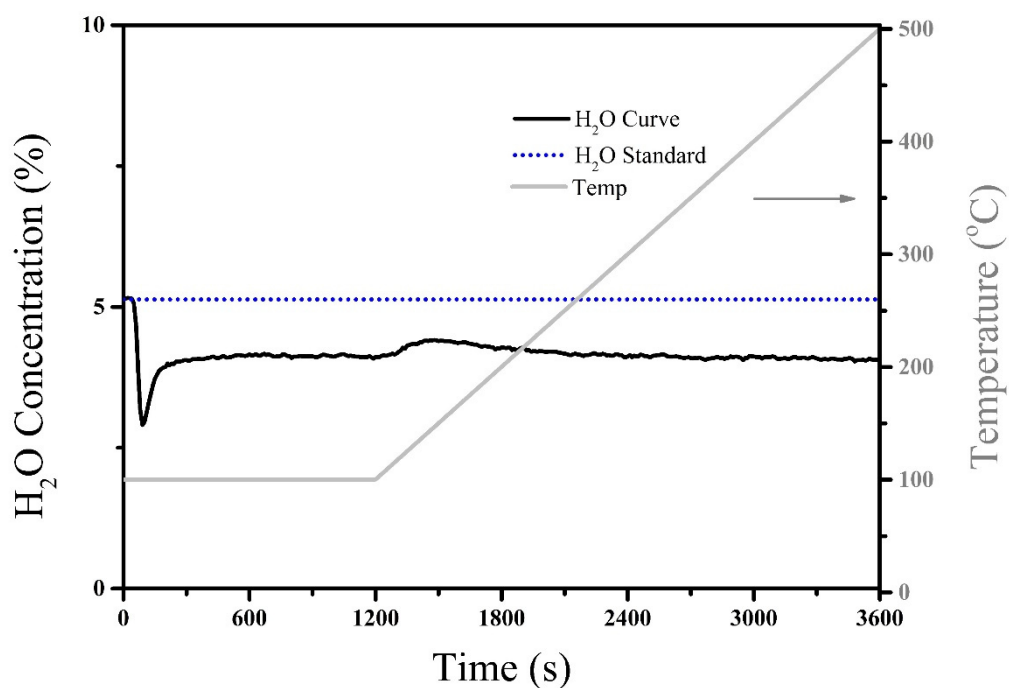

**Figure S8.** Transient H<sub>2</sub>O adsorption at 100°C and temperature programmed desorption of the Pd/SSZ-13 catalysts.

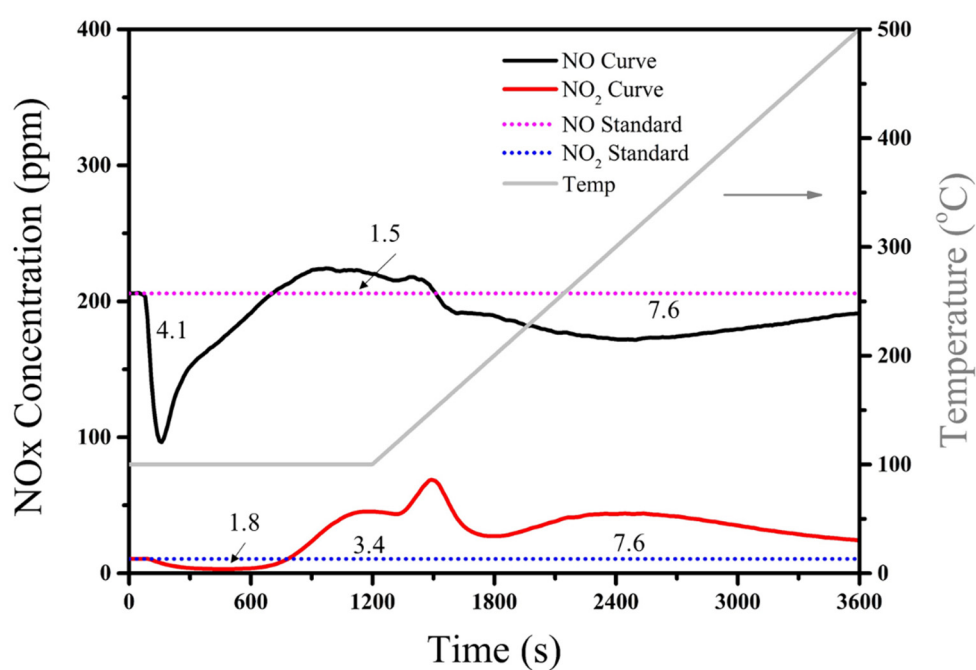

**Figure S9.** Transient NO<sub>x</sub> adsorption at 100°C and temperature programmed desorption of the H-SSZ-13 catalysts.
