# Supplementary material for: Deactivation of Pd/SSZ-13 by Potassium and Water for Passive NOx Adsorption
Source: MDPI journal article supplement (doi:10.3390/pr10020222), 2022-01-25
Supplement: s1 [file s1]

Archive with 1 entries (1 files):
- processes-1550578-supplementary.pdf
